# Supplementary material for: Infective Endocarditis: Predictive Factors for Diagnosis and Mortality in Surgically Treated Patients
Source: MDPI journal article supplement (doi:10.3390/jcdd9120467), 2022-12-19
Supplement: s1 [file s1]

**Supplemental Table S1: Characteristics of IE-negative patients**

| Pat | CRP<br>(mg/L) | PCT<br>(ng/mL) | WBC<br>(1/nL) | Veg. Size<br>(mm) | Blood culture               | Valve<br>cult | Valve<br>PCR | Valve  | Intraoperative finding<br>and histopathology | Alt. diagnosis                        |
|-----|---------------|----------------|---------------|-------------------|-----------------------------|---------------|--------------|--------|----------------------------------------------|---------------------------------------|
| 1   | 2.9           | 0.01           | 7.7           | 13                | Staphylococcus<br>hominis   | Neg.          | Neg.         | Aortic | Degenerative                                 | Pneumonia                             |
| 2   | 22.0          | 0.20           | 14.9          | 10                | Negative                    | Neg.          | Neg.         | Mitral | Perforation (degenerative)                   | Cardiac decompensation with pneumonia |
| 3   | 6.2           | n.d.           | 6.7           | 14                | Negative                    | Neg.          | Neg.         | Aortic | Degenerative                                 | Pneumonia                             |
| 4   | 80.0          | n.d.           | 10.3          | 7                 | Streptococcus<br>pneumoniae | Neg.          | Neg.         | Mitral | Perforation                                  | Cardiac decompensation with pneumonia |
| 5   | 65.0          | n.d.           | 12.5          | 11                | Streptococcus<br>salivarius | Neg.          | Neg.         | Aortic | Degenerative                                 | Urosepsis with dialysis               |
| 6   | 59.0          | 0.18           | 7.6           | 10                | MSSA                        | Neg.          | Neg.         | Aortic | Degenerative                                 | Pneumonia                             |
| 7   | 92.0          | 0.01           | 6.6           | 8                 | Enterococcus faecalis       | Neg.          | Neg.         | Mitral | Degenerative                                 | Colon cancer                          |
| 8   | 47.0          | 1.31           | 7.3           | 10                | MSSA                        | Neg.          | Neg.         | Mitral | Degenerative                                 | Pneumonia                             |
| 9   | 56.0          | 0.65           | 8.7           | 12                | Streptococcus oralis        | Neg.          | Neg.         | Aortic | Degenerative                                 | Cardiac decompensation with pneumonia |
| 10  | 266.0         | 0.17           | 11.5          | 10                | Negative                    | Neg.          | Neg.         | Mitral | Degenerative                                 | Sepsis                                |
| 11  | 240.0         | 0.99           | 8.1           | 10                | MSSA                        | Neg.          | Neg.         | Mitral | Excessive calcification                      | Urosepsis with dialysis               |
| 12  | 58.0          | 0.05           | 7.4           | 10                | Negative                    | Neg.          | Neg.         | Mitral | Degenerative                                 | Cardiac decompensation with pneumonia |
| 13  | 28.7          | 0.06           | 7.7           | 7                 | Negative                    | Neg.          | Neg.         | Aortic | Degenerative                                 | Cardiac decompensation                |
| 14  | 47.0          | n.d.           | 5.2           | 12                | Streptococcus<br>viridans   | Neg.          | Neg.         | Aortic | Degenerative                                 | Acute pericarditis                    |

In these 14 patients, IE diagnosis was rejected mainly based on perioperative diagnostics. Abbreviations: CRP = C-reactive protein; IE = infective endocarditis; MSSA = methicillin-susceptible staphylococcus aureus; Neg. = negative, PCT = procalcitonin; PCR = polymerase chain reaction; Veg. = vegetation; WBC = White blood cell count.
